# Supplementary material
Source: PubMed Central journal article supplement (PMC4815585)

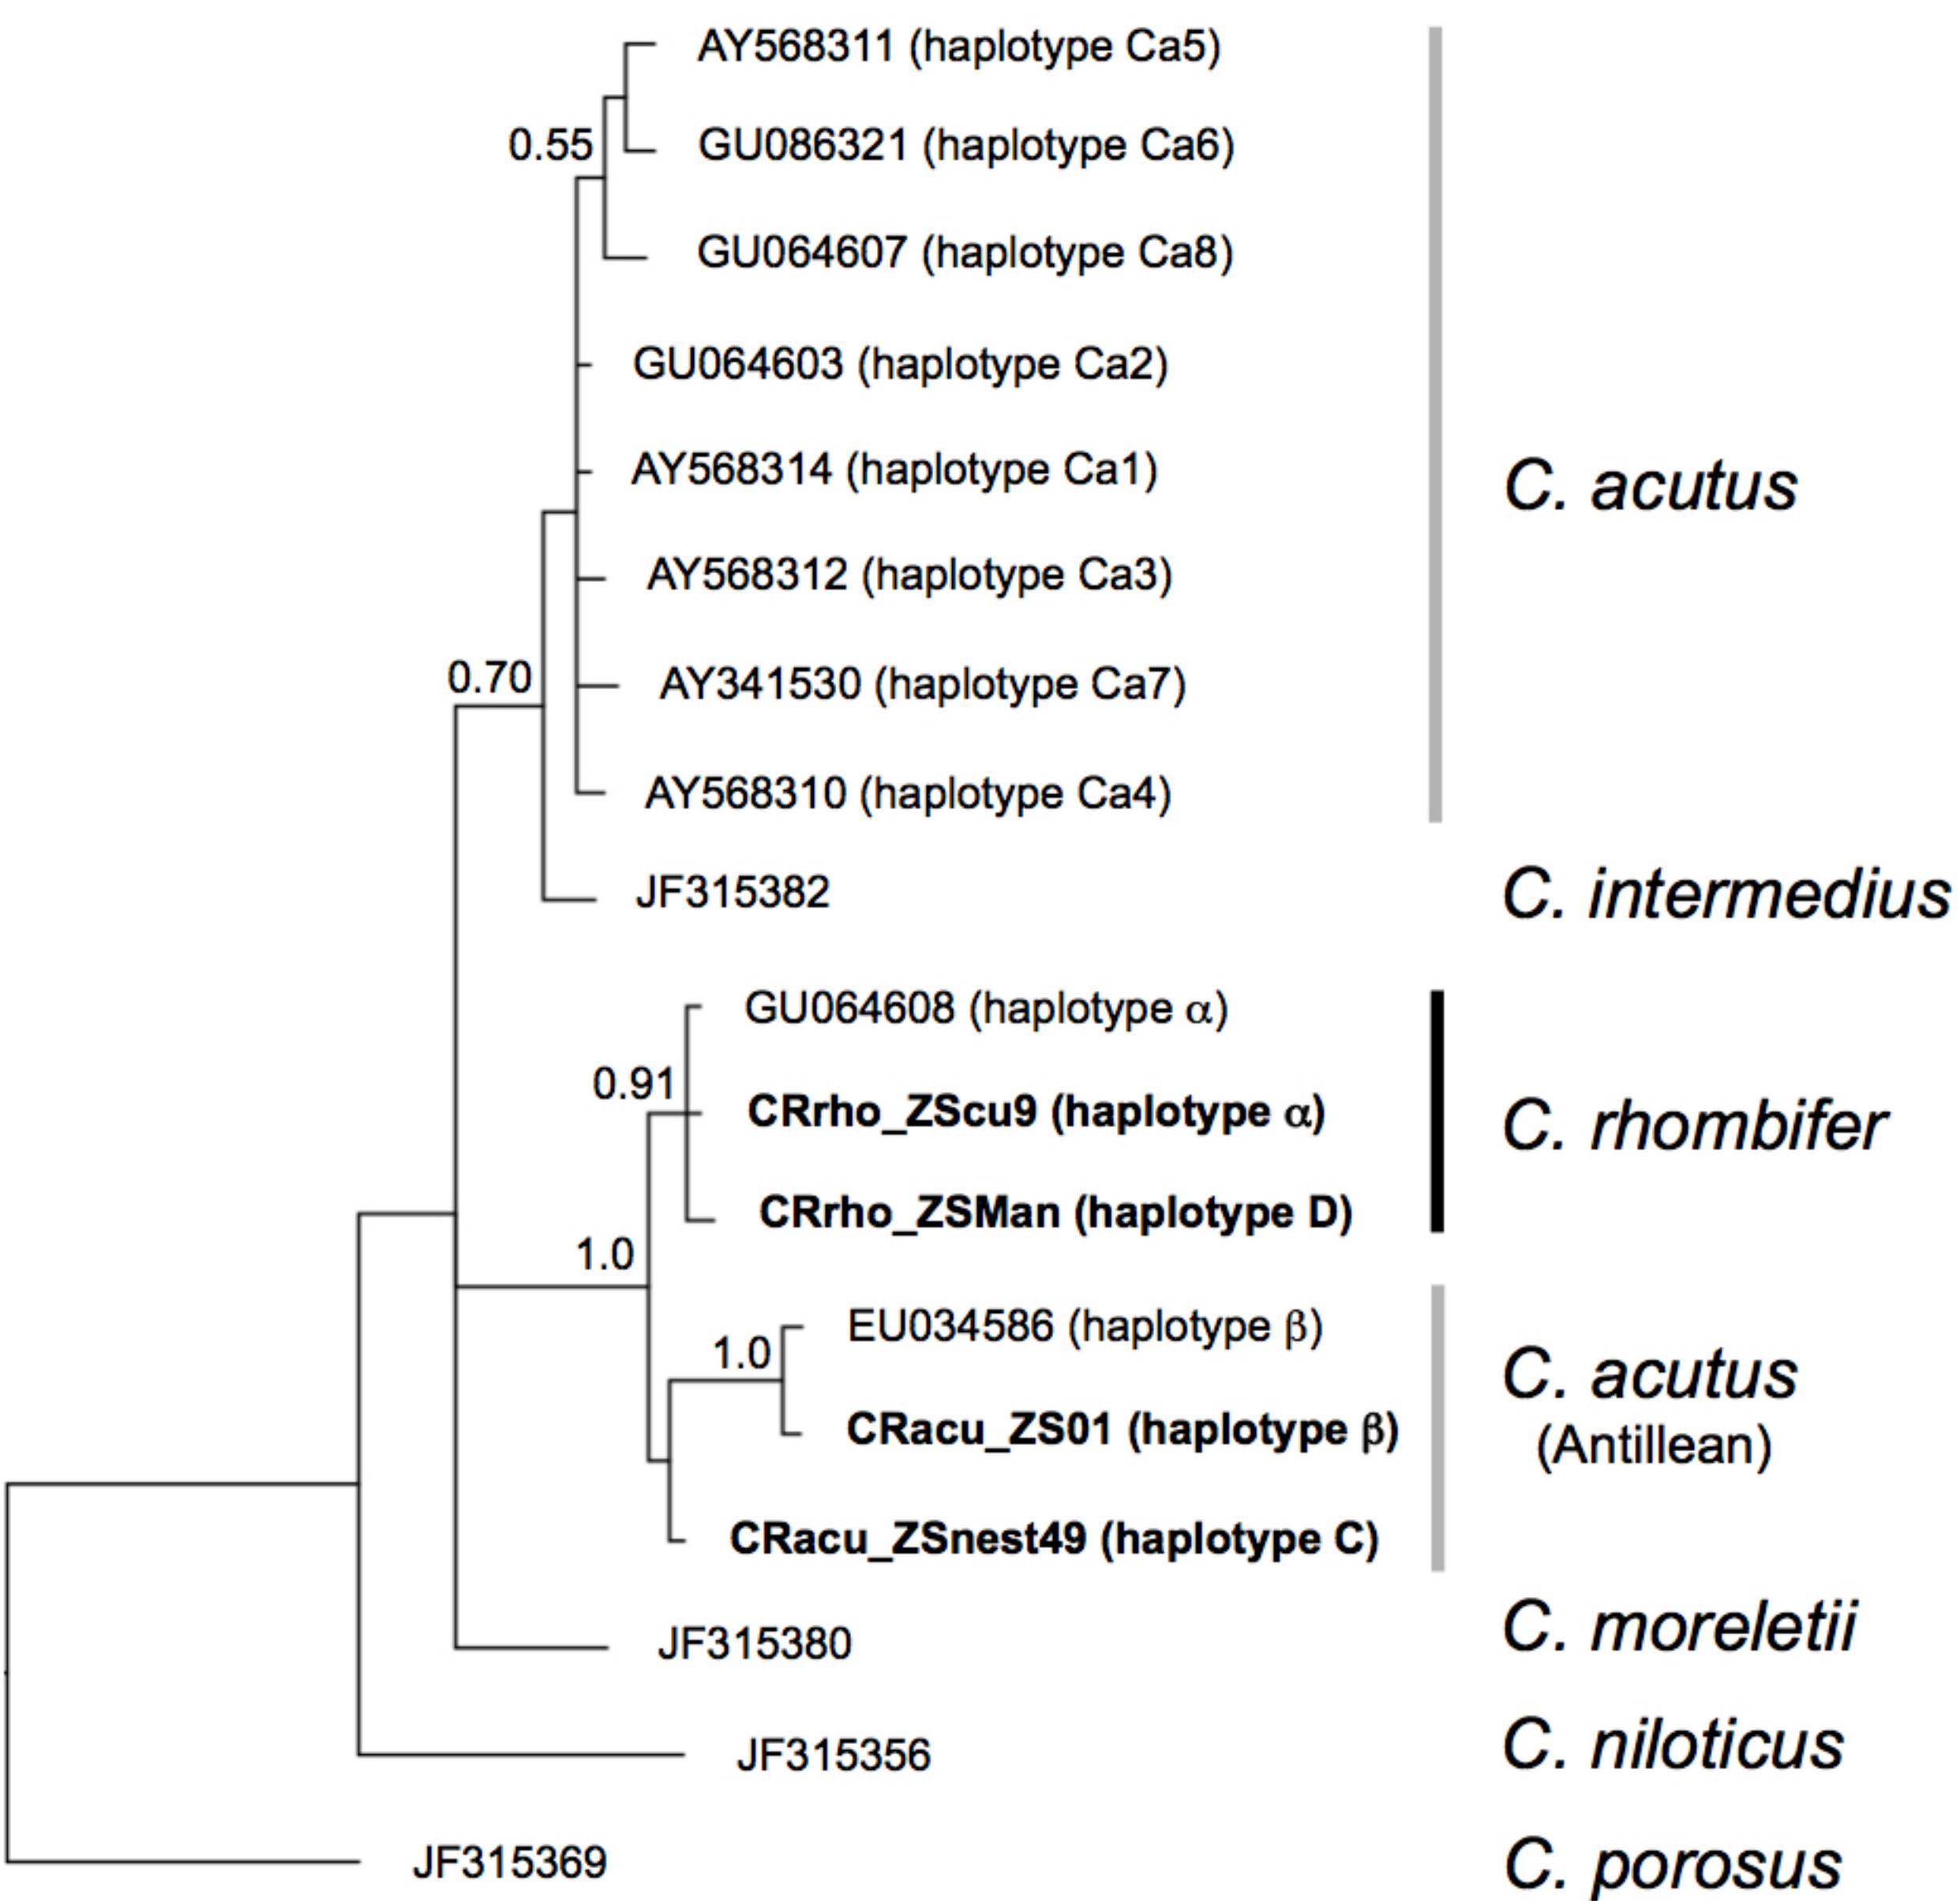

0.05

Supplement: hdy201496x1.pdf [file hdy201496x1.pdf]

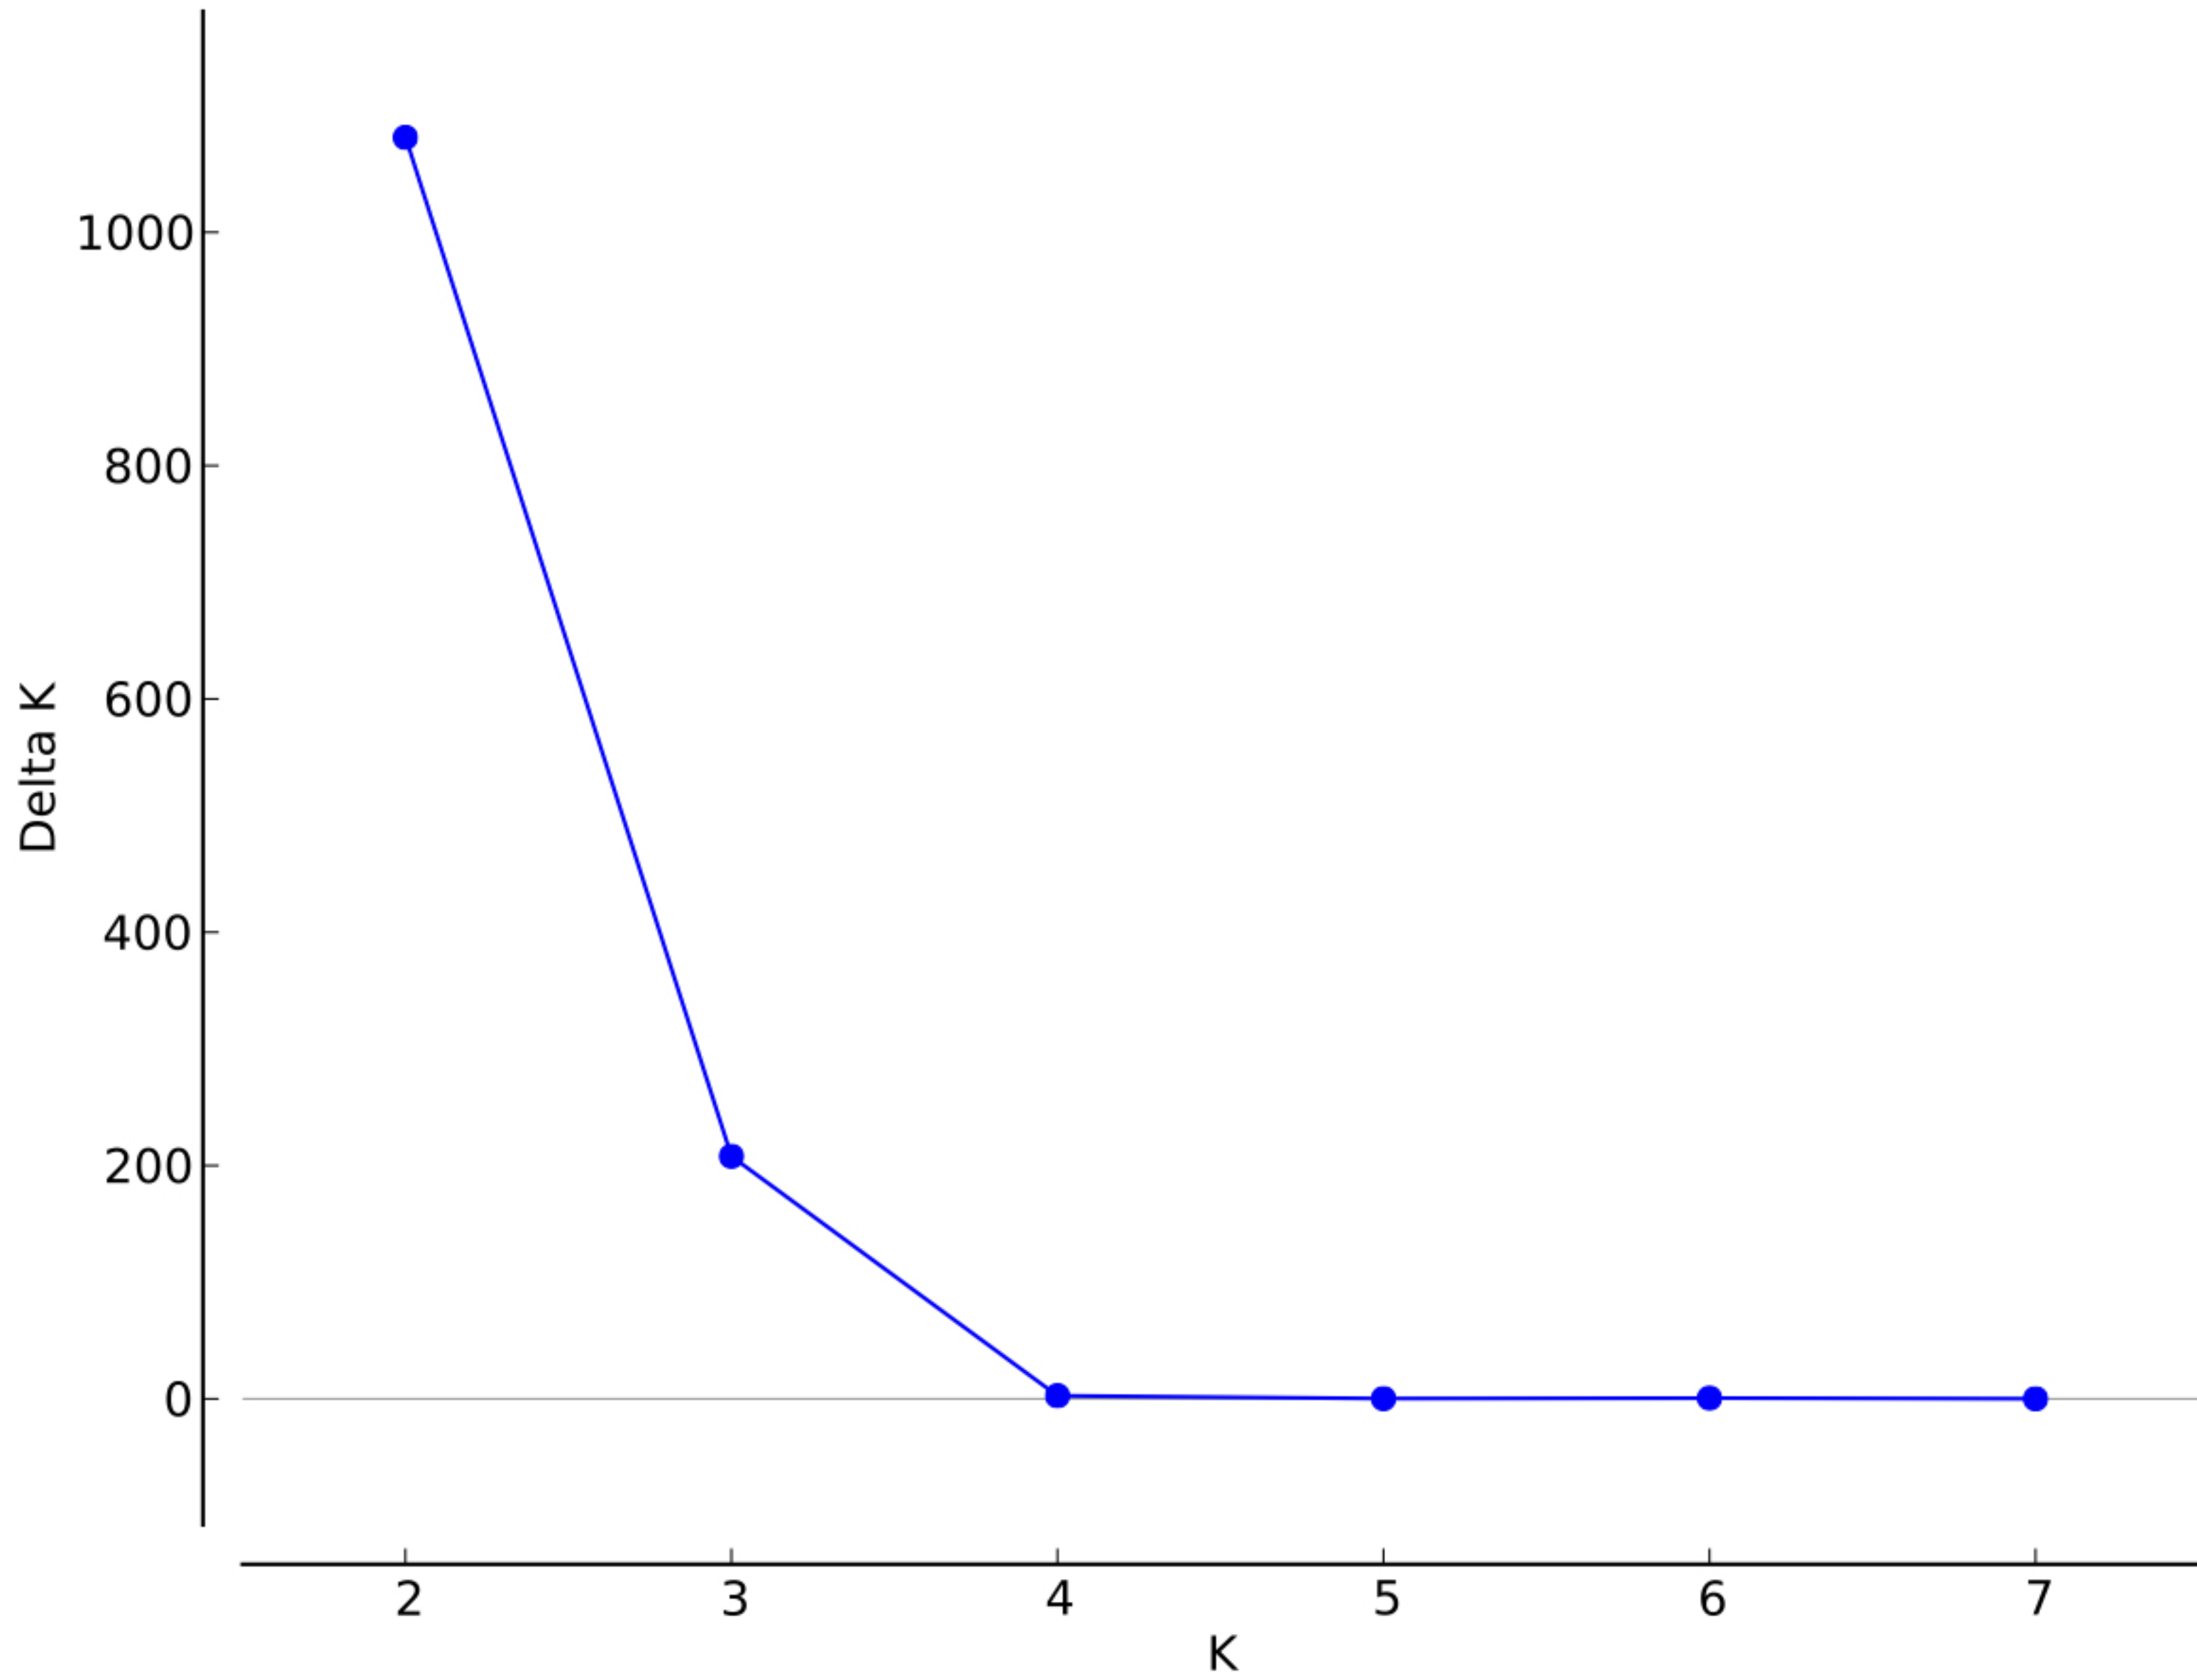

Supplement: hdy201496x2.pdf [file hdy201496x2.pdf]
